# Supplementary material
Source: PubMed Central journal article supplement (PMC3582941)

# Supporting Information

## Total Synthesis of Sedum Alkaloids via Catalyst Controlled aza-Cope Rearrangement and Hydroformylation with Formaldehyde

Hong Ren and William D. Wulff\*

*Department of Chemistry, Michigan State University  
East Lansing, MI 48824  
E-mail: wulff@chemistry.msu.edu*

### Table of Contents

|                                                                  |    |
|------------------------------------------------------------------|----|
| NMR spectra for compound <b>8d</b> .....                         | 2  |
| NMR spectra for enriched compound <b>10a</b> .....               | 3  |
| NMR spectra for enriched compound <b>11a</b> .....               | 4  |
| NMR spectra for enriched compound <b>10d</b> .....               | 5  |
| NMR spectra for enriched compound <b>11d</b> .....               | 6  |
| NMR spectra for a mixture of <b>14</b> and <b>15</b> (12:1)..... | 7  |
| NMR spectra for compound <b>16b</b> .....                        | 8  |
| NMR spectra for compound <b>17a</b> .....                        | 9  |
| NMR spectra for compound <b>17b</b> .....                        | 10 |
| NMR spectra for compound <b>19</b> .....                         | 11 |
| NMR spectra for compound <b>20</b> .....                         | 12 |
| NMR spectra for compound <b>22</b> .....                         | 13 |
| NMR spectra for compound <b>23</b> .....                         | 14 |
| NMR spectra for compound <b>24</b> .....                         | 15 |
| NMR spectra for compound <b>25</b> .....                         | 16 |
| NMR spectra for compound (+)- <b>allosedridine</b> .....         | 17 |
| NMR spectra for compound <b>26</b> .....                         | 18 |
| NMR spectra for compound <b>27</b> .....                         | 19 |
| NMR spectra for compound <b>28</b> .....                         | 20 |
| NMR spectra for compound (+)- <b>sedridine</b> .....             | 21 |

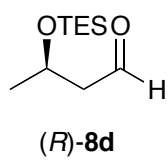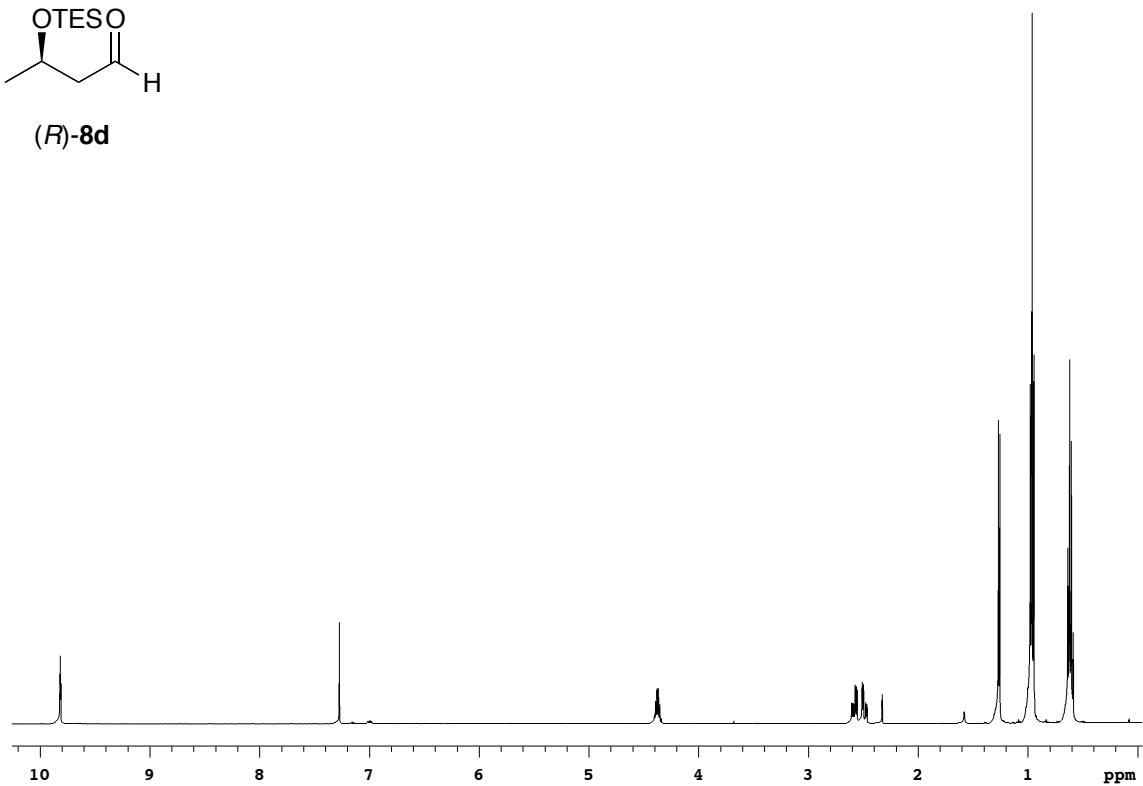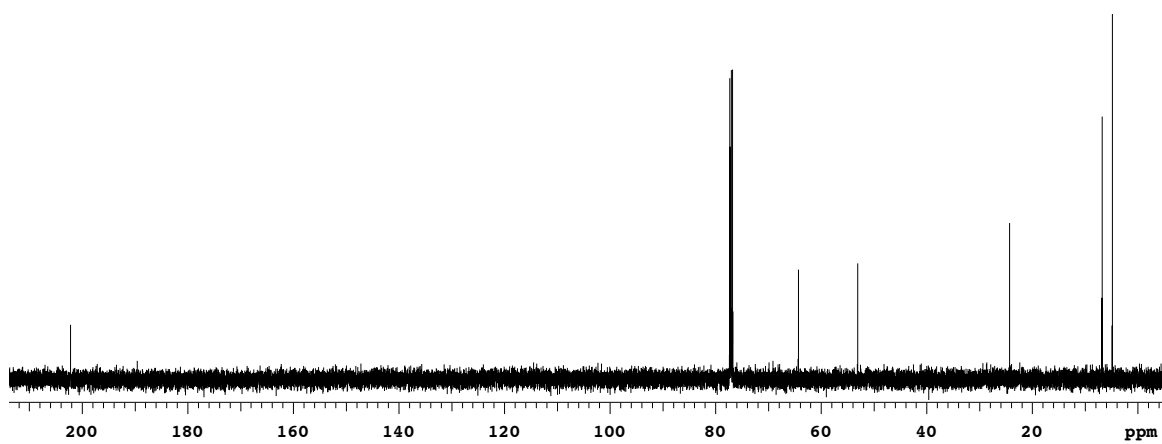

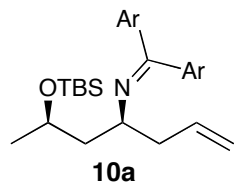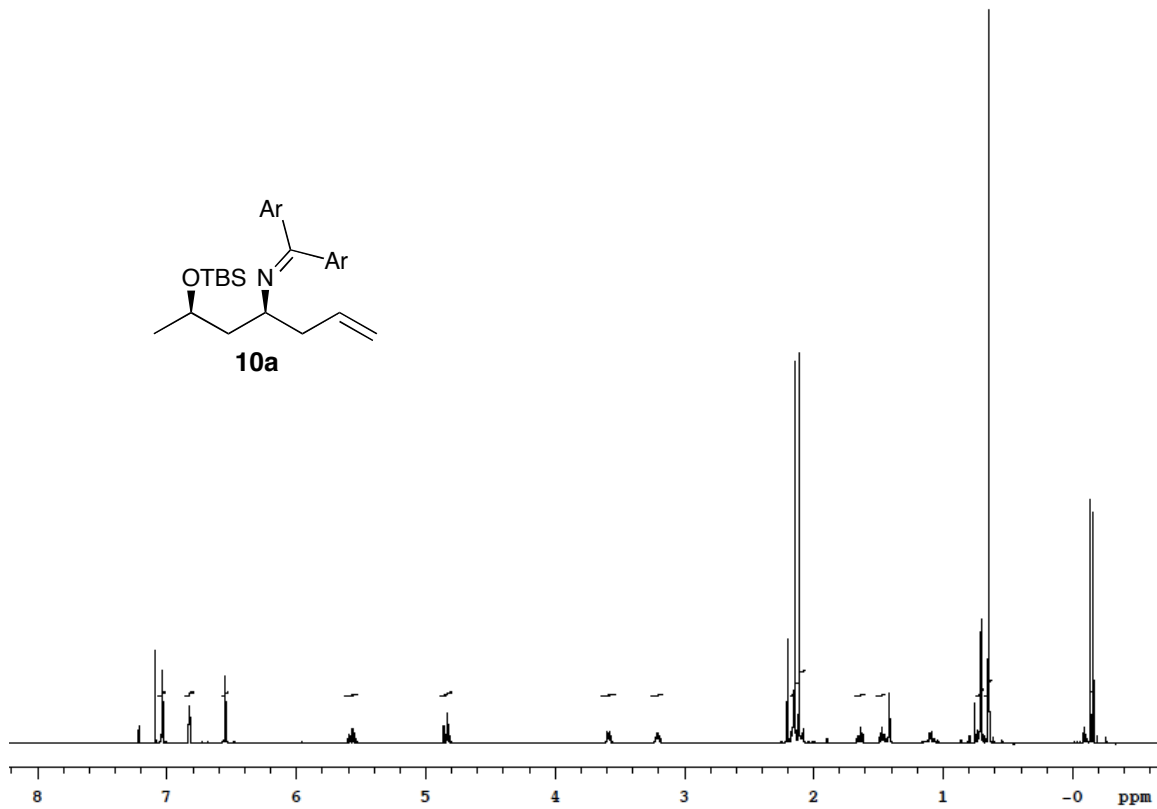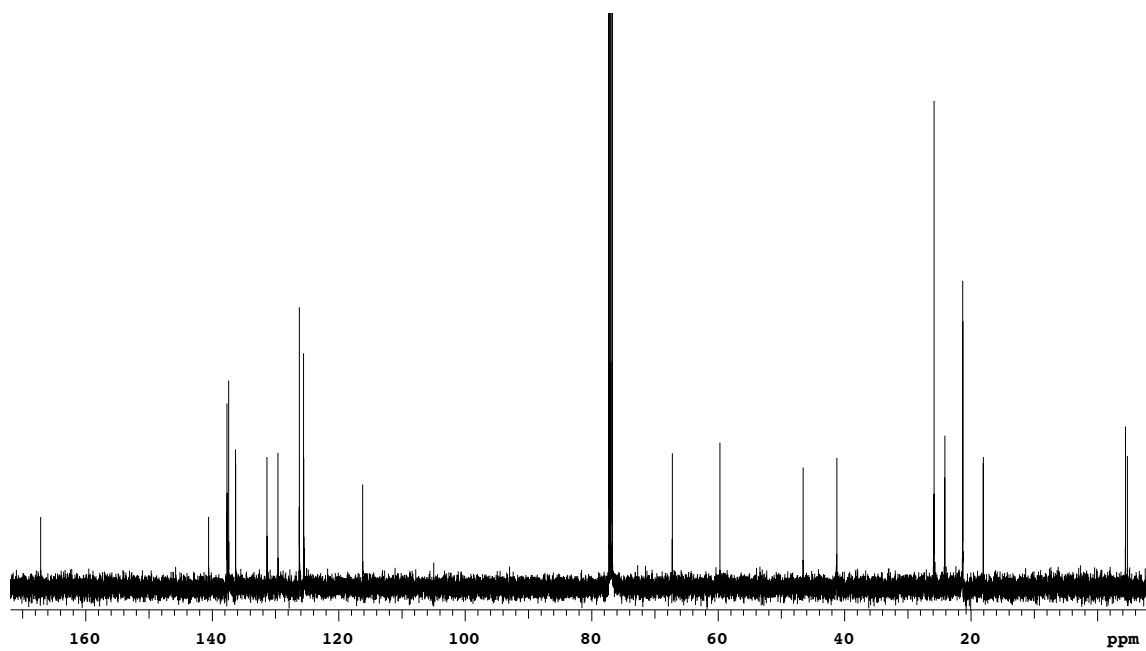

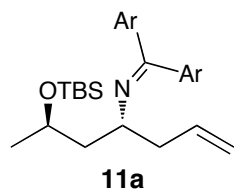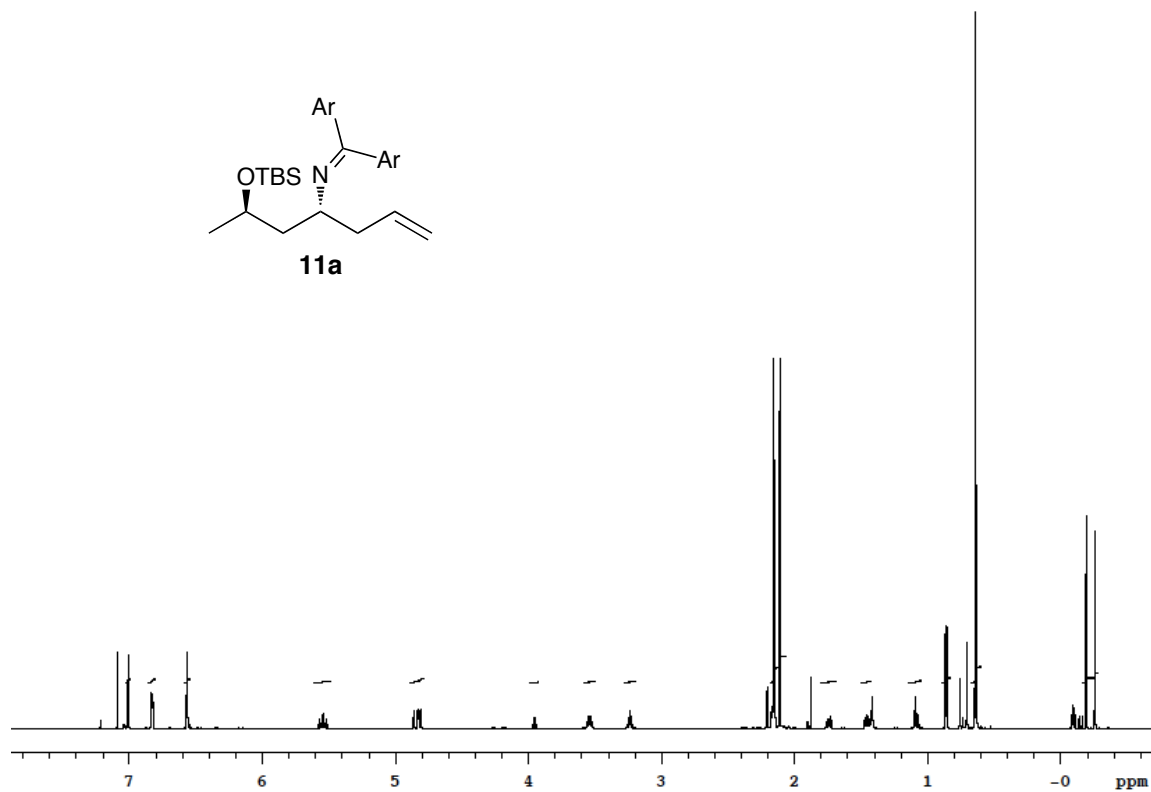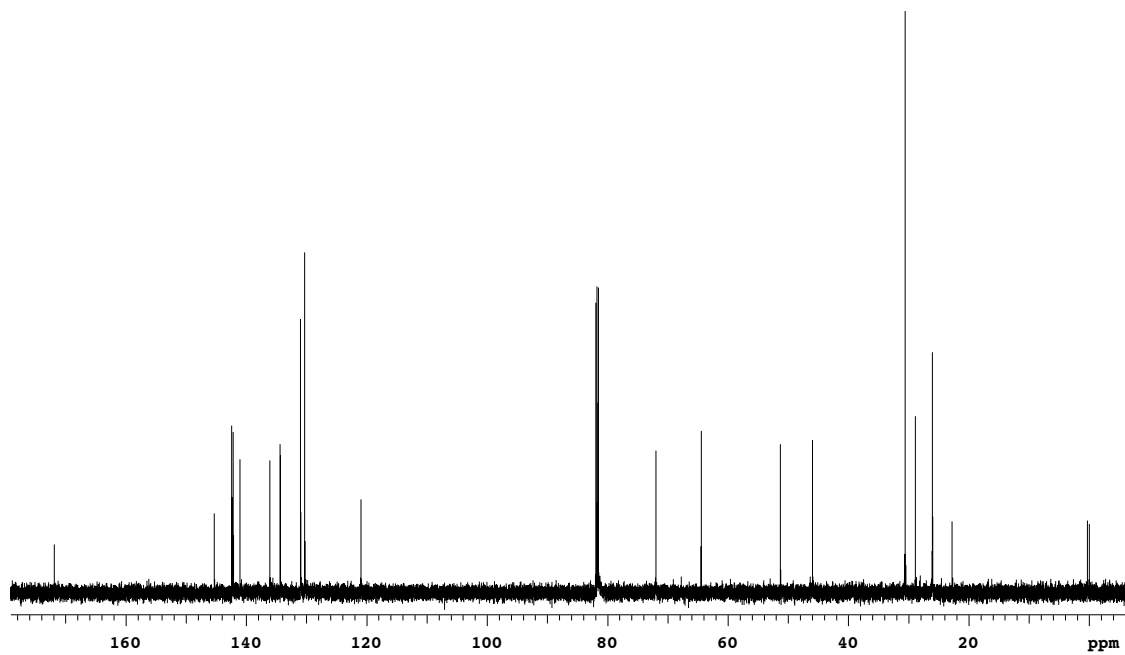

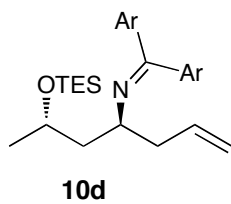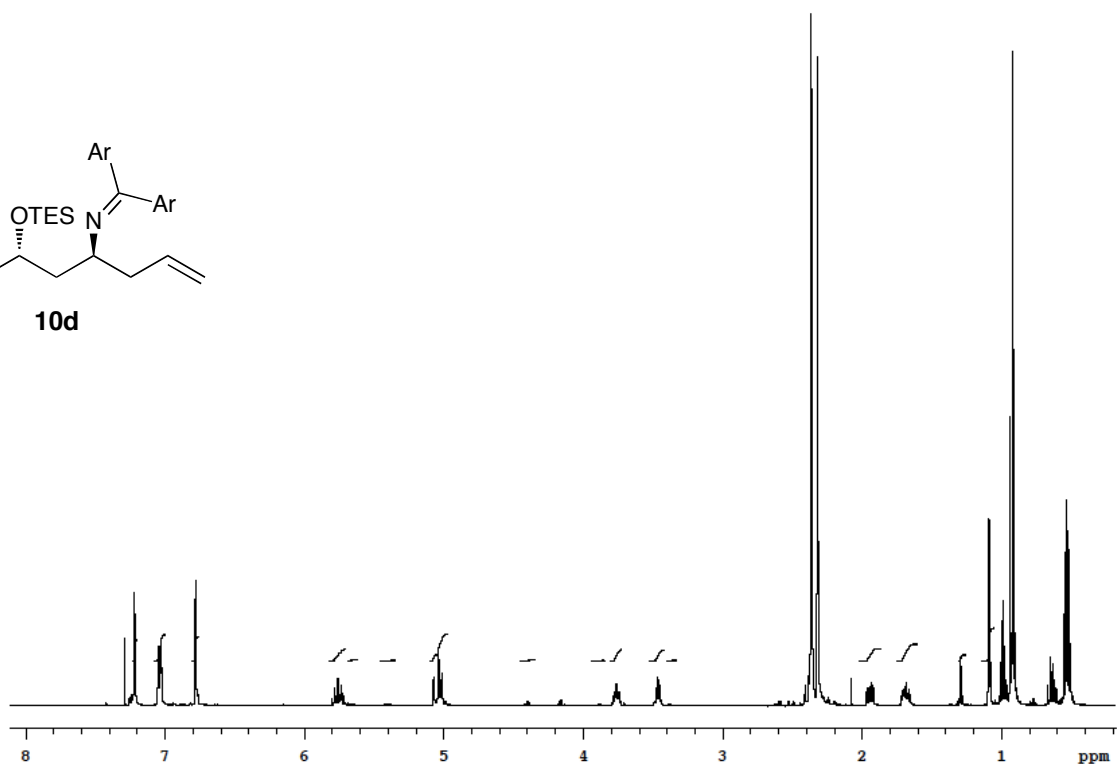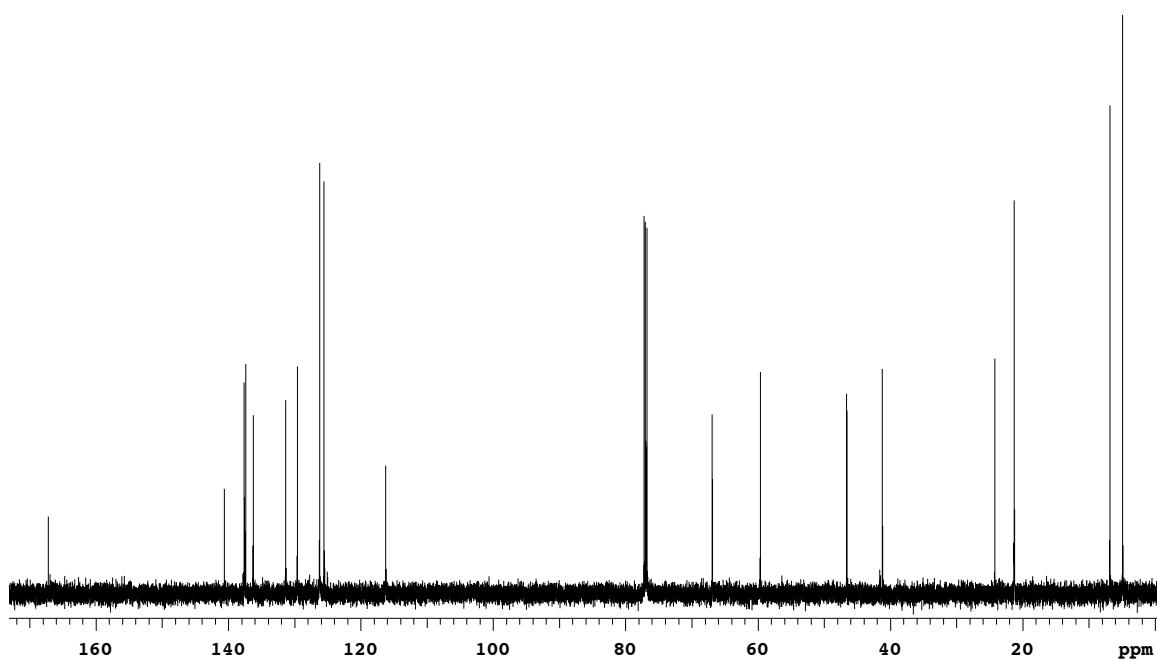

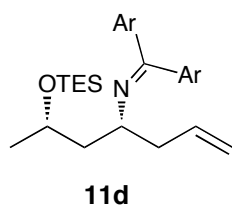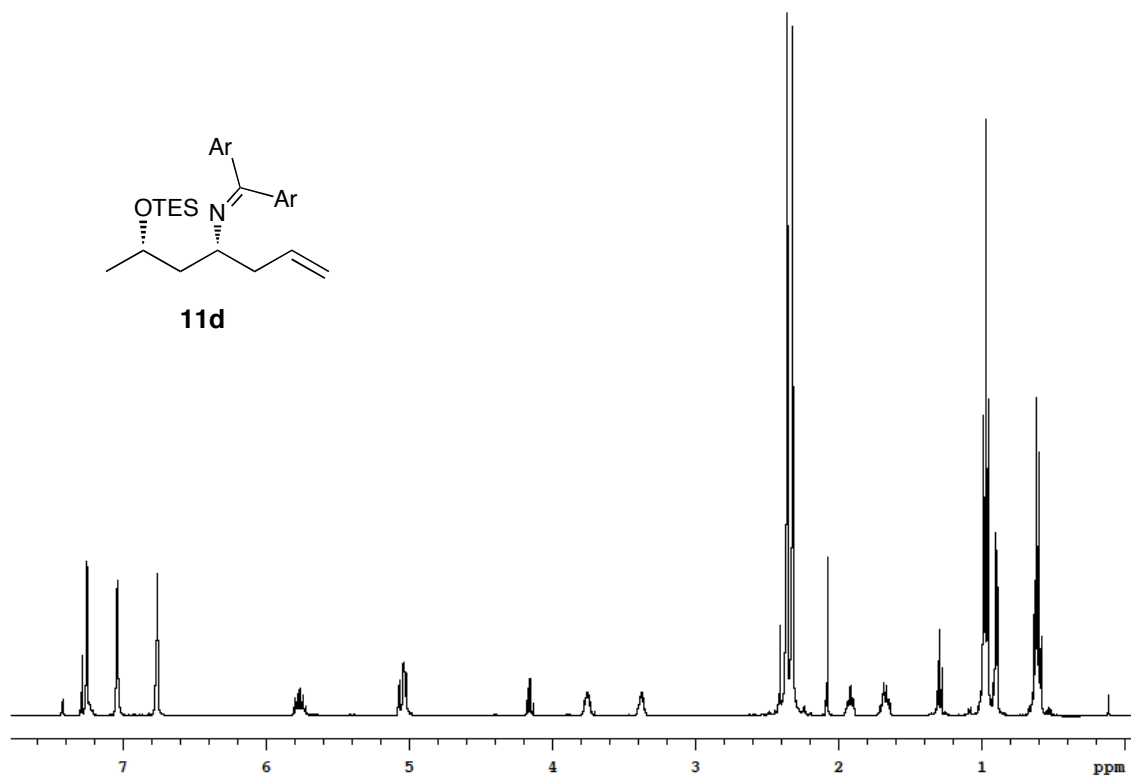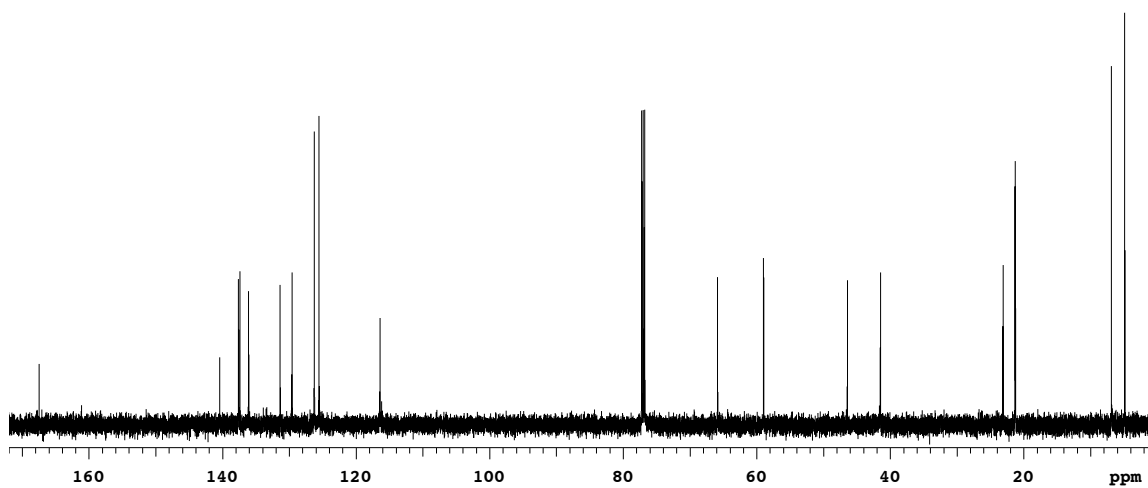

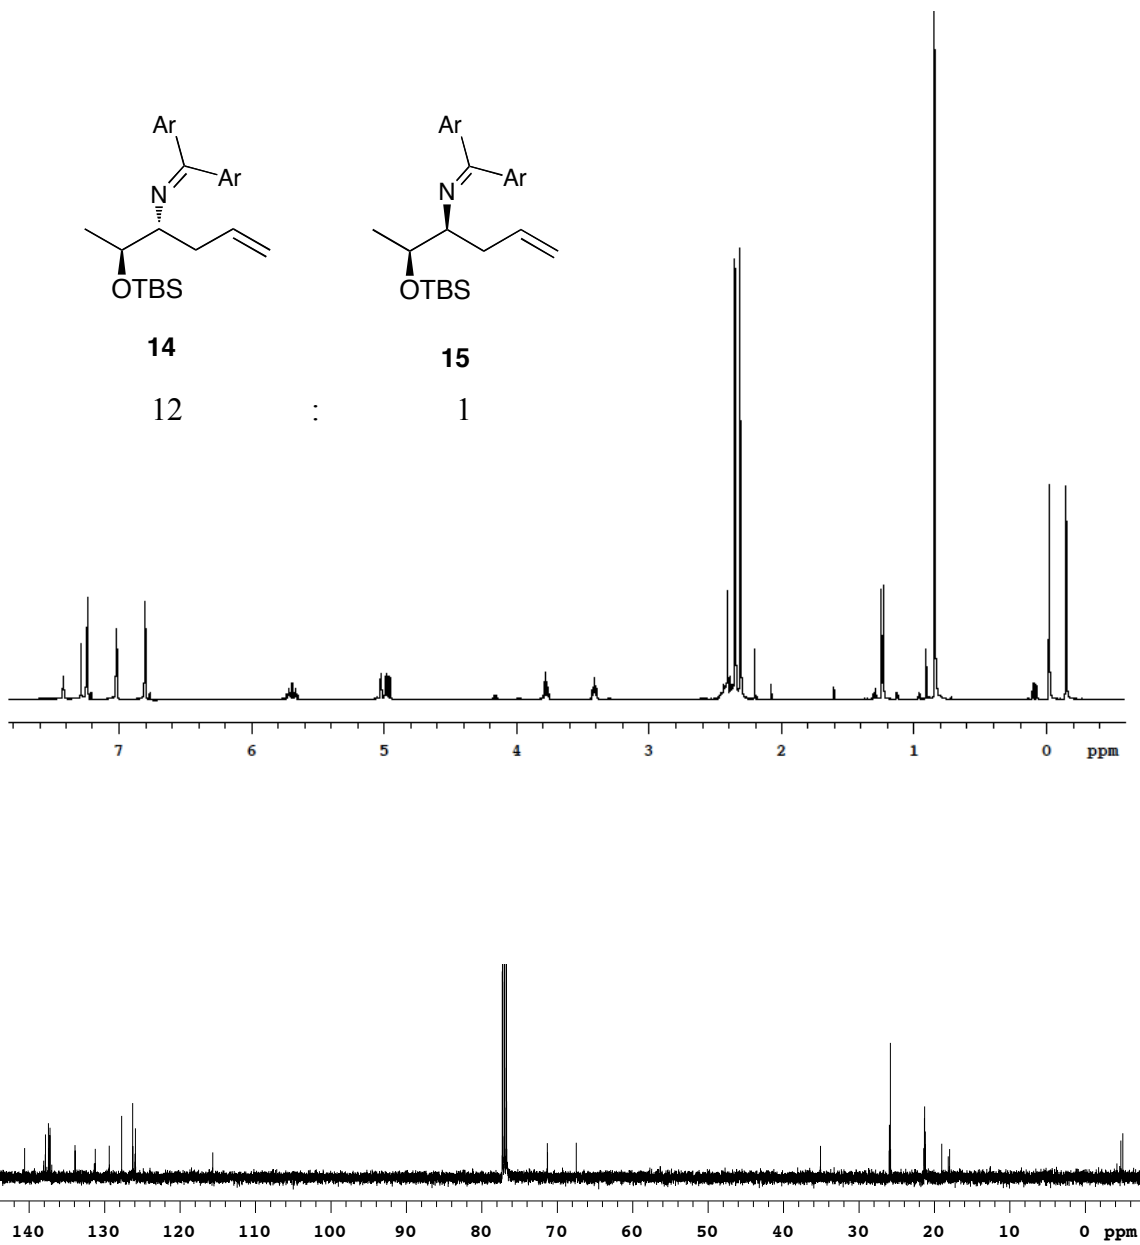

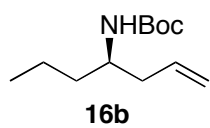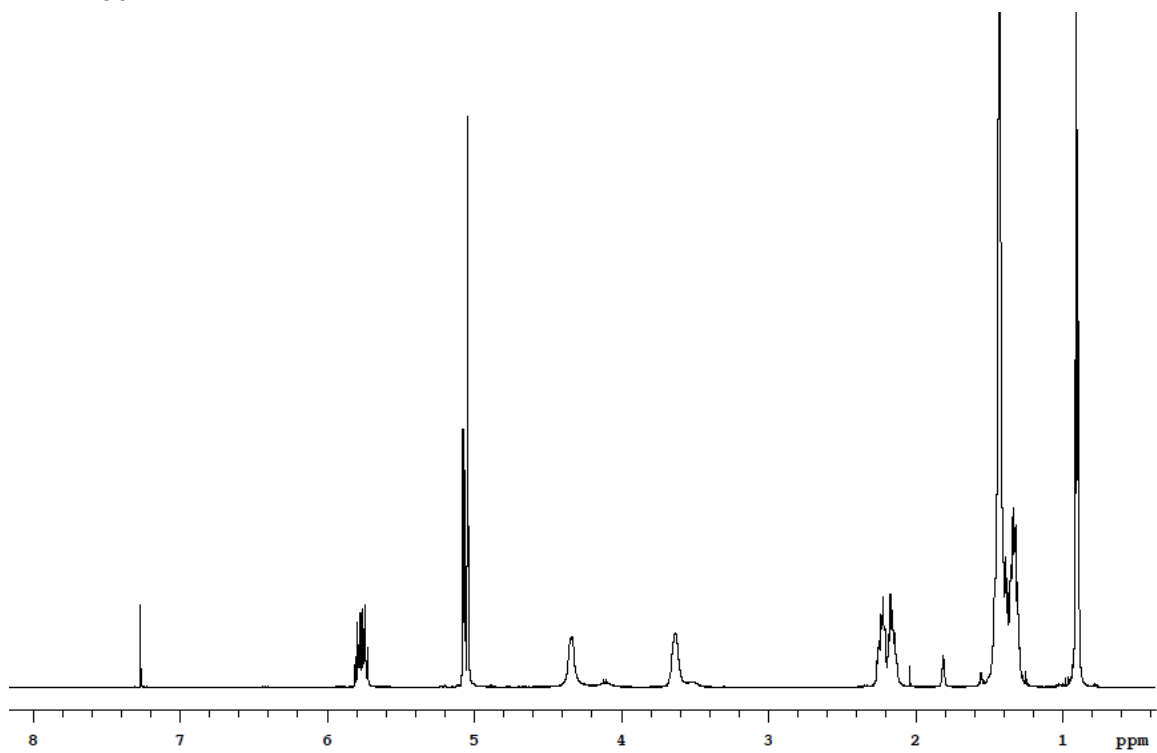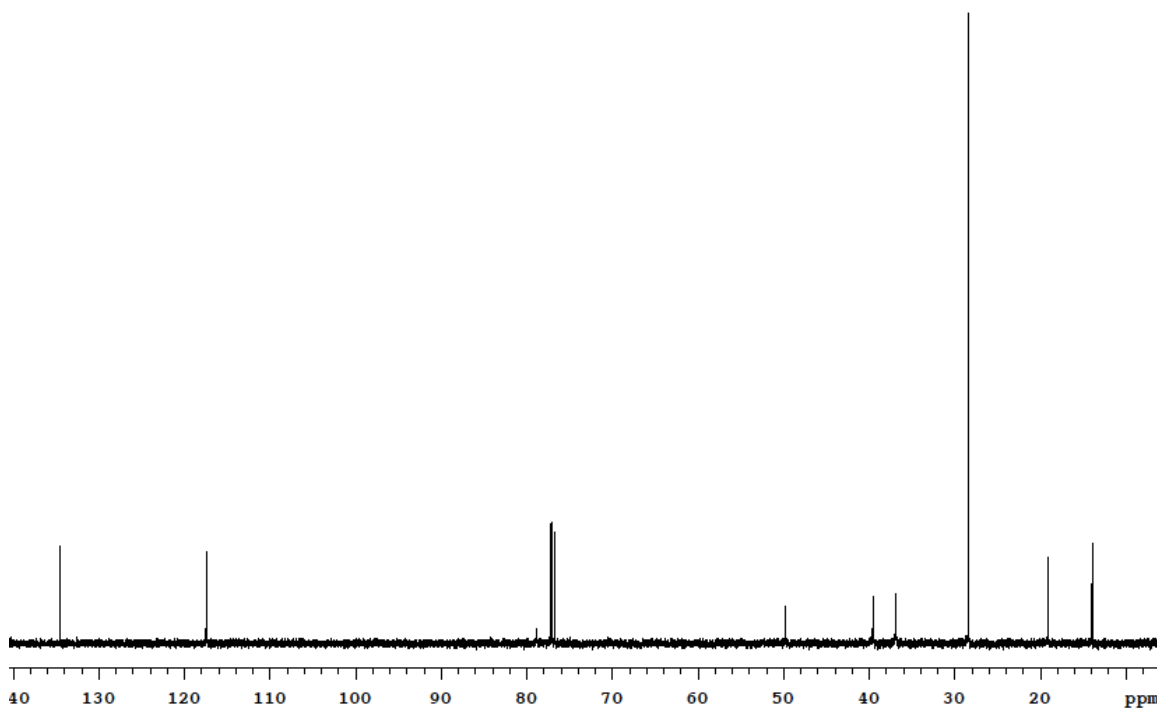



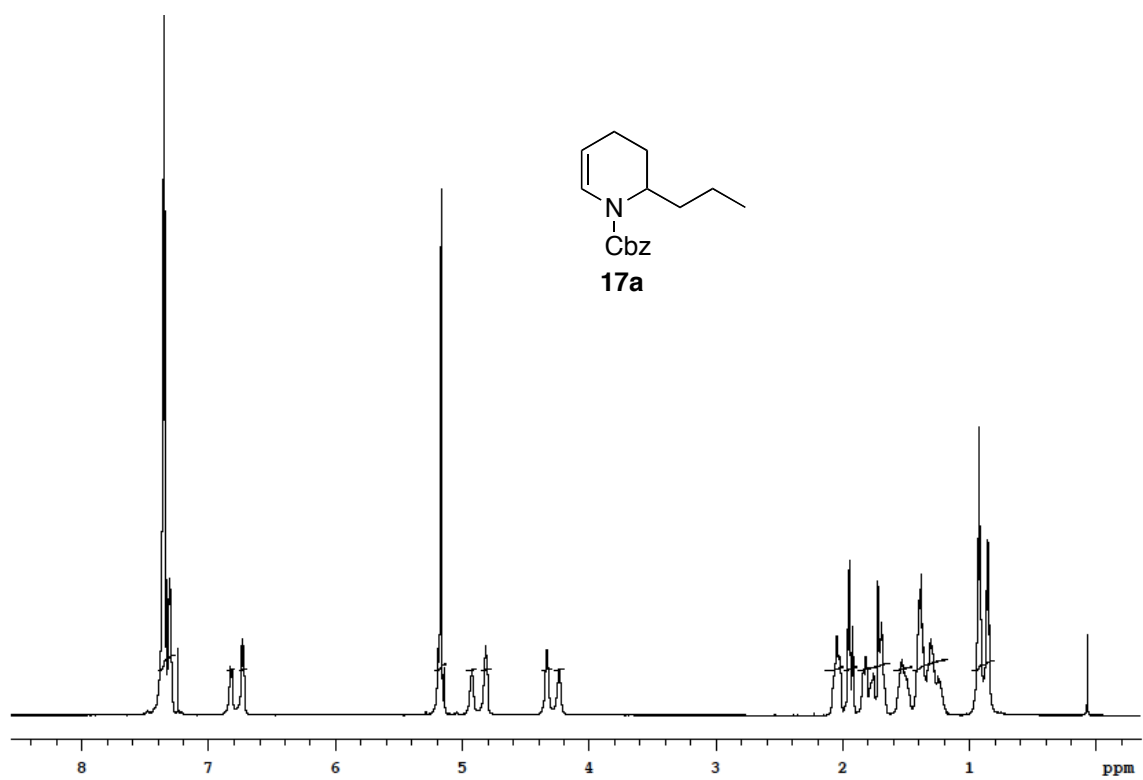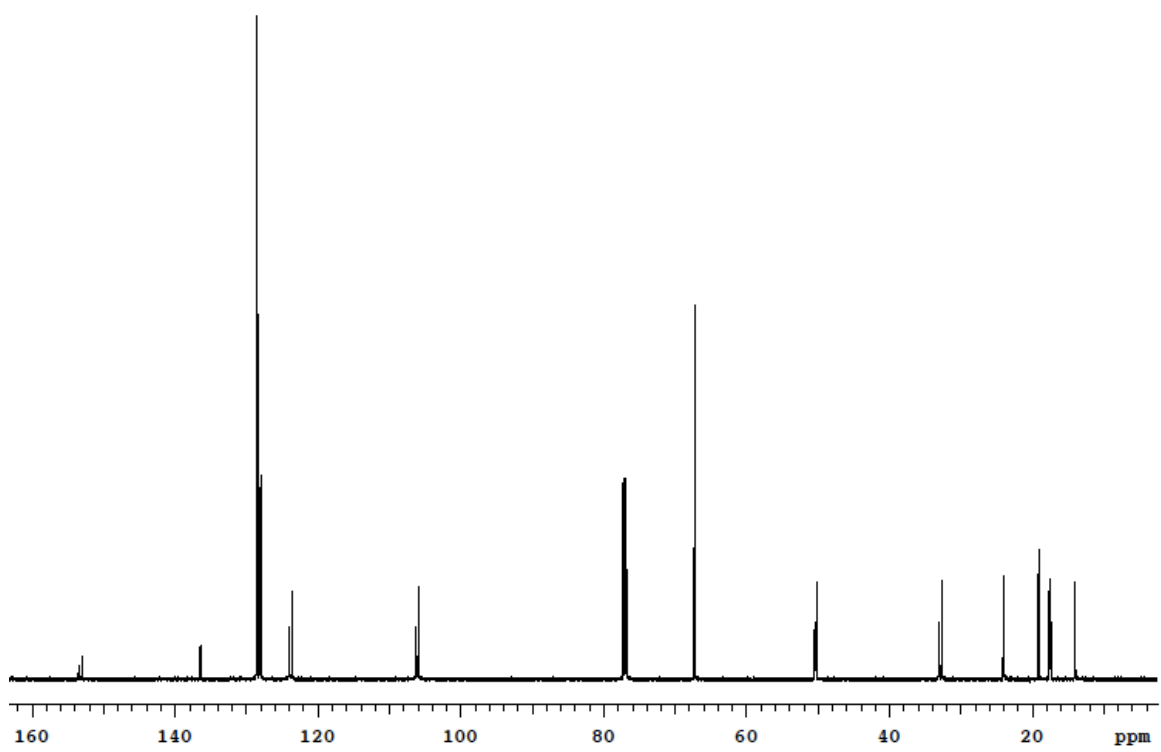

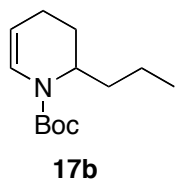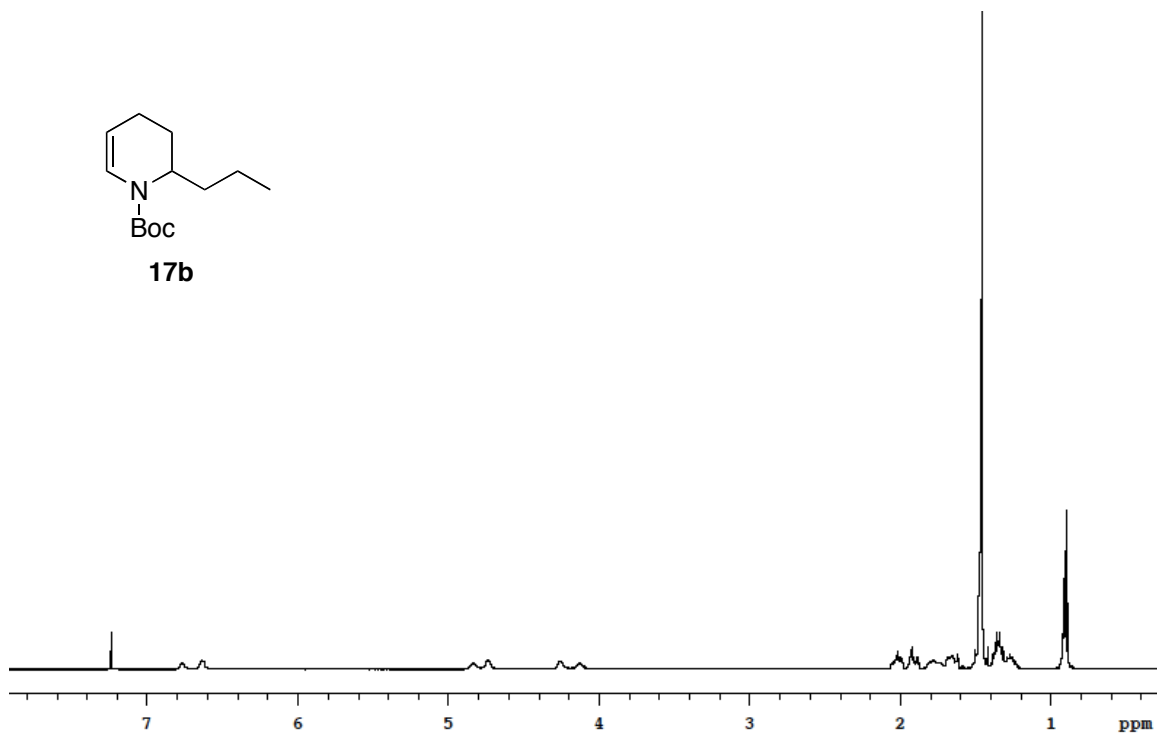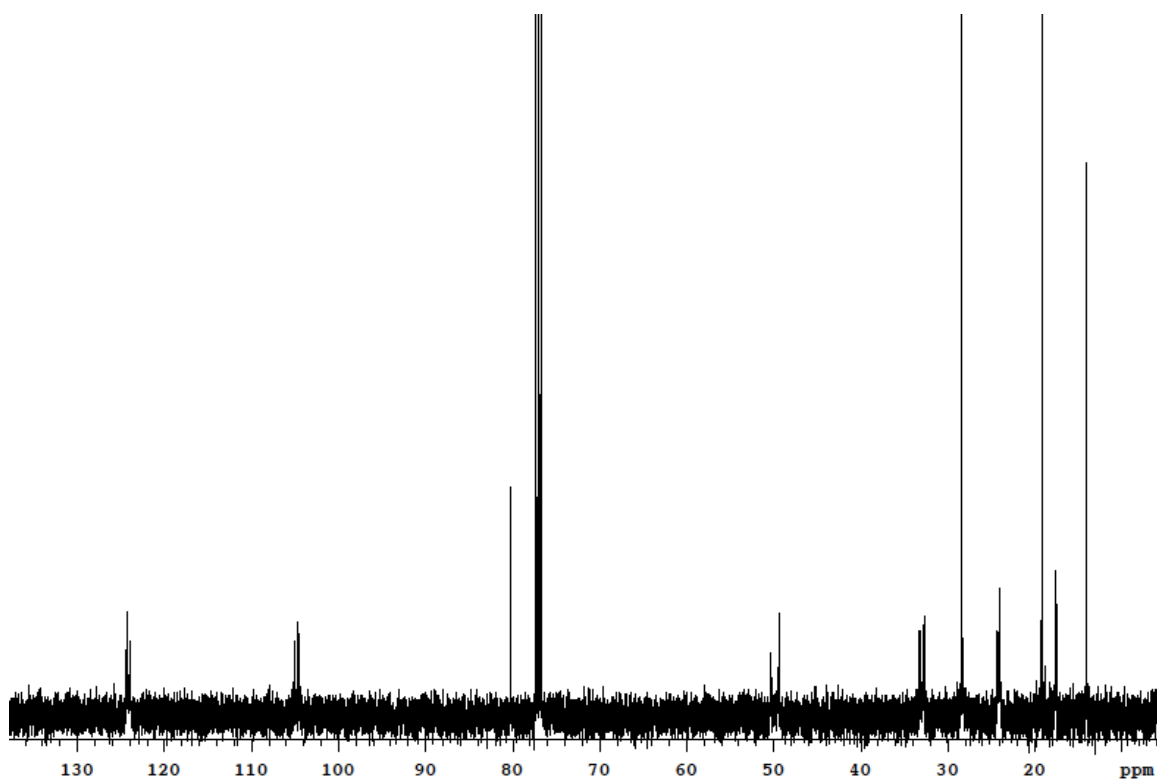

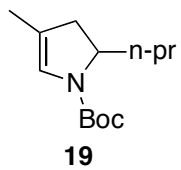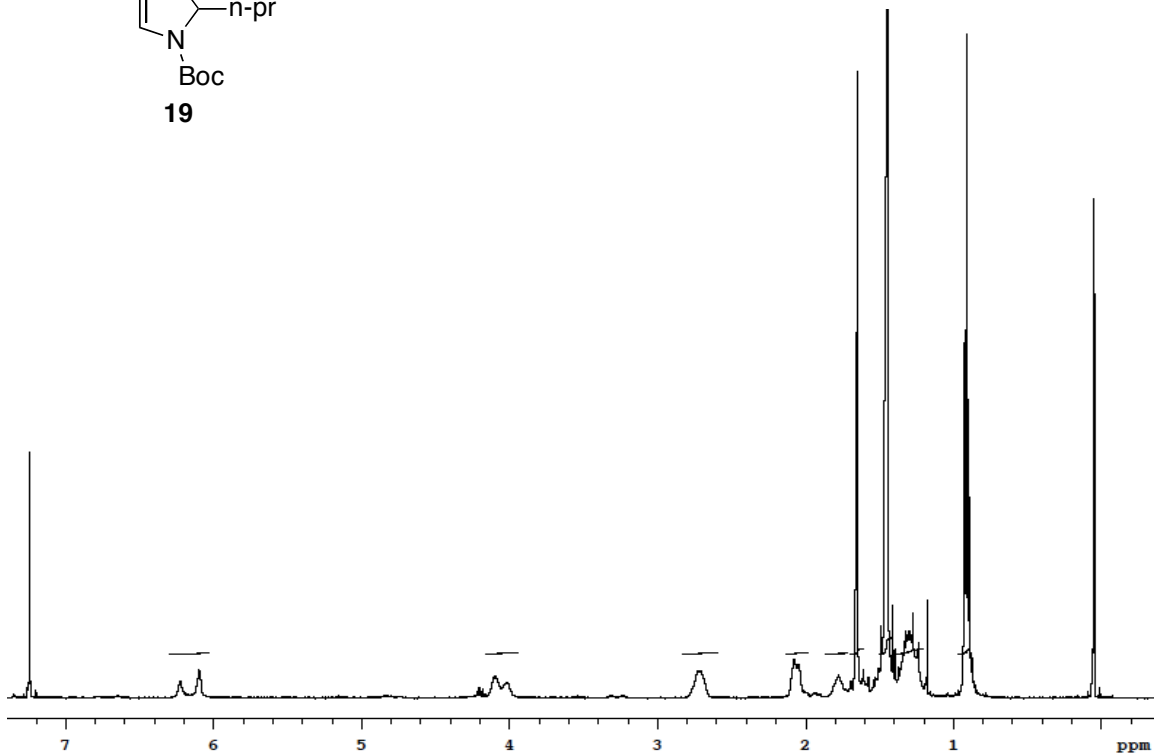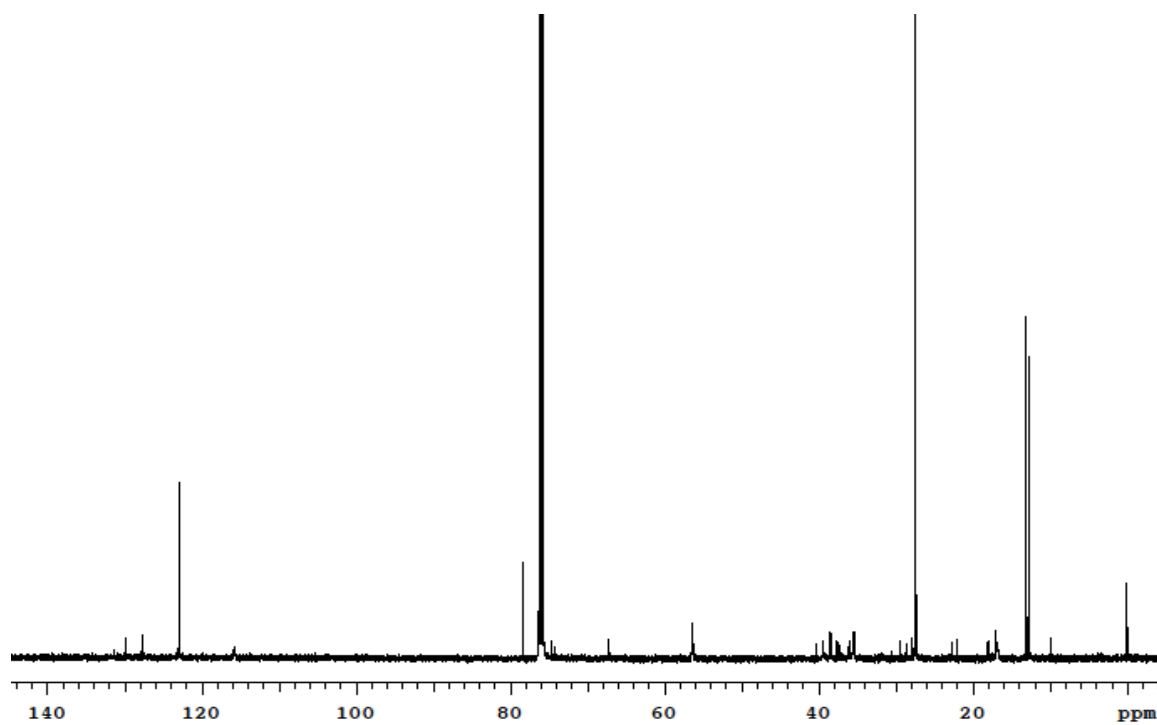

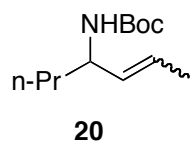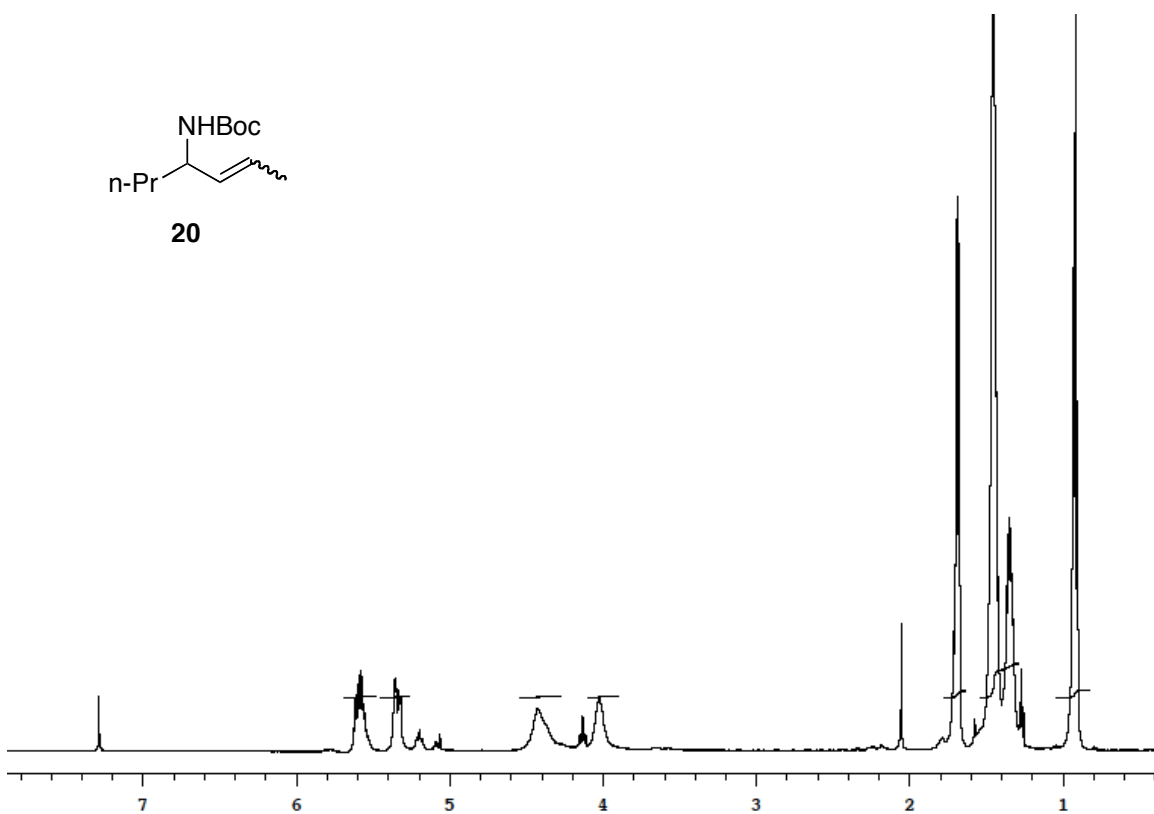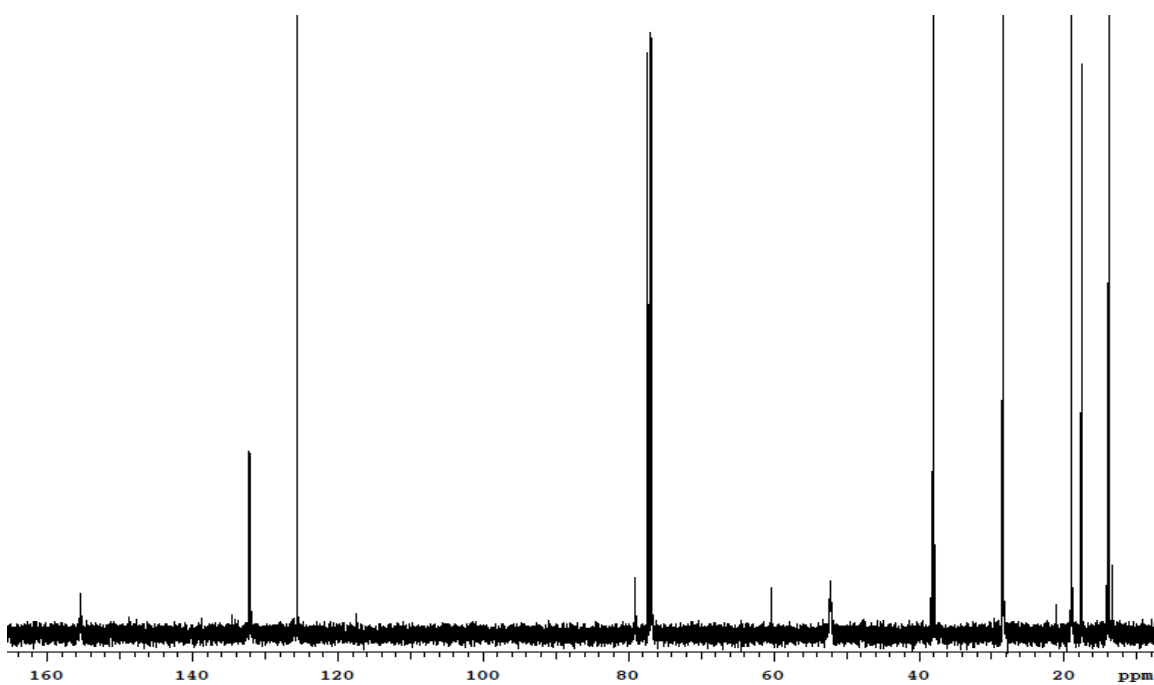

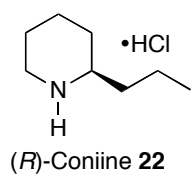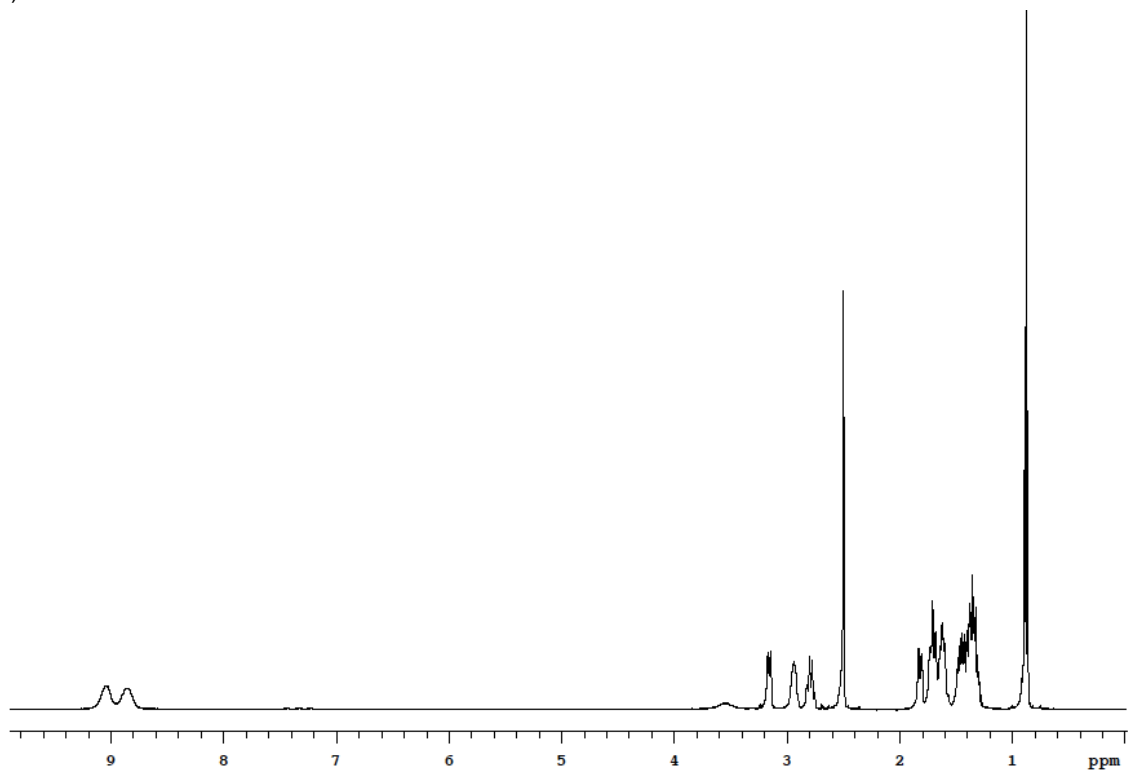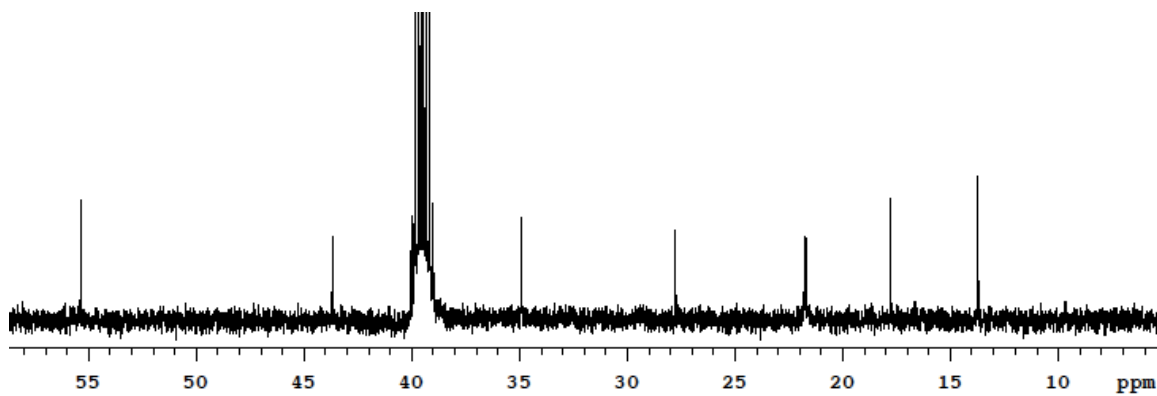

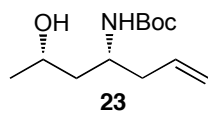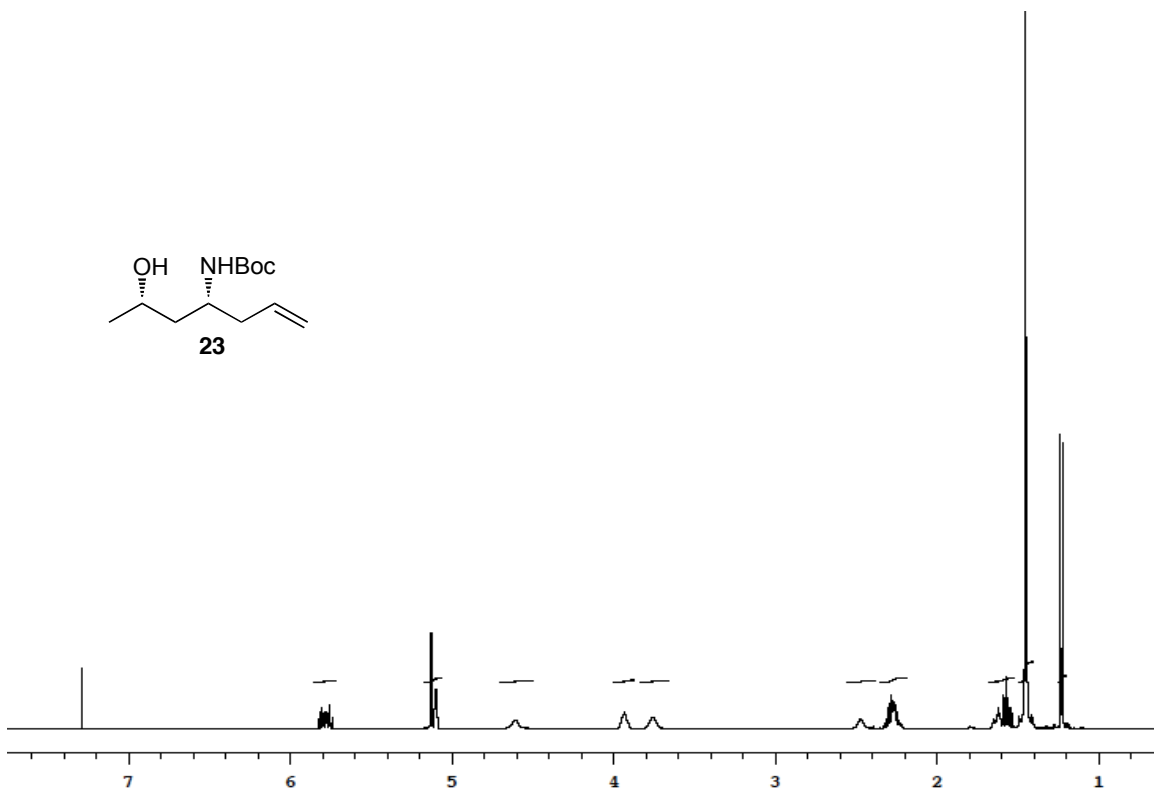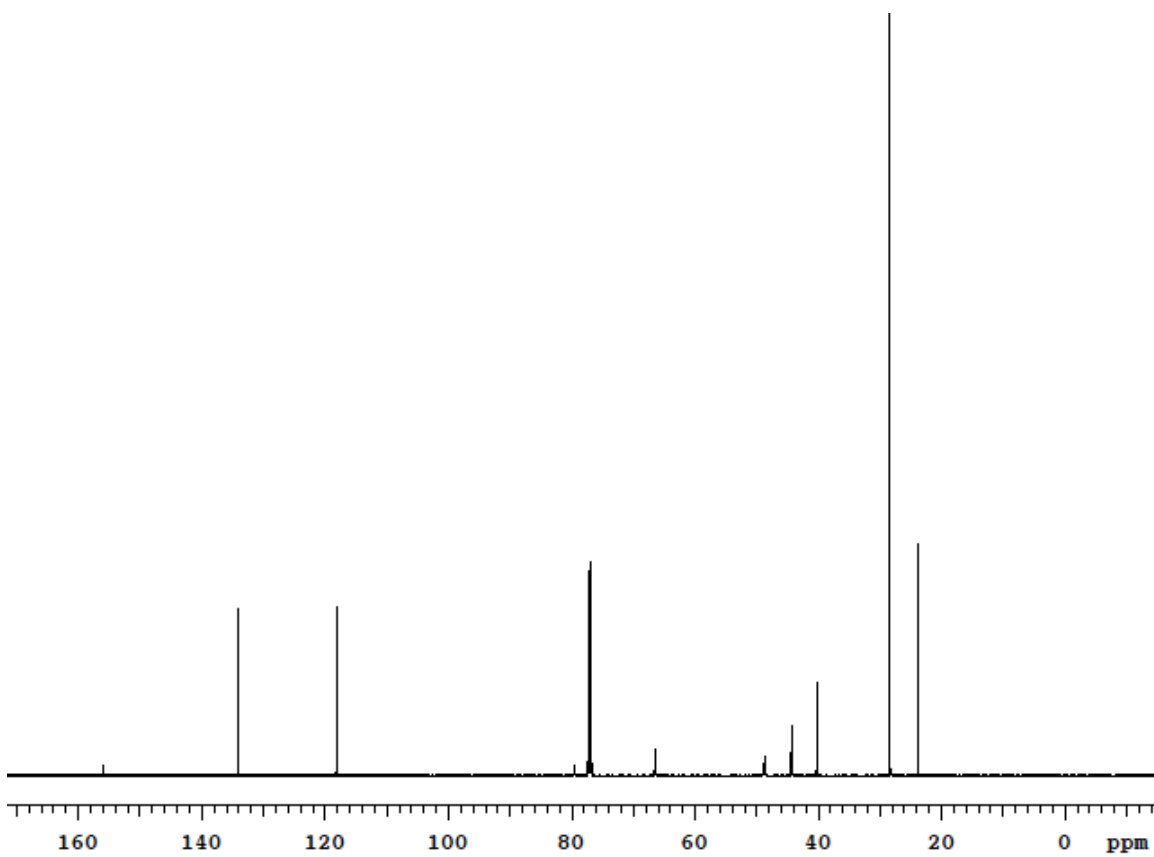

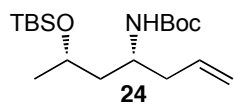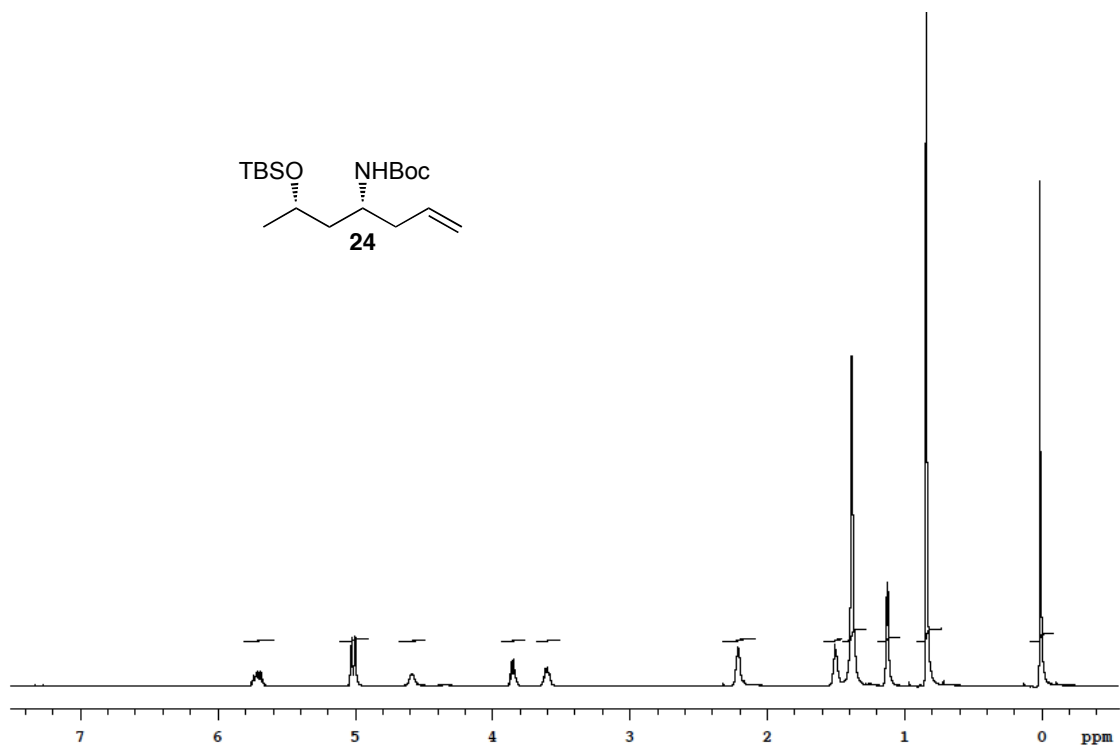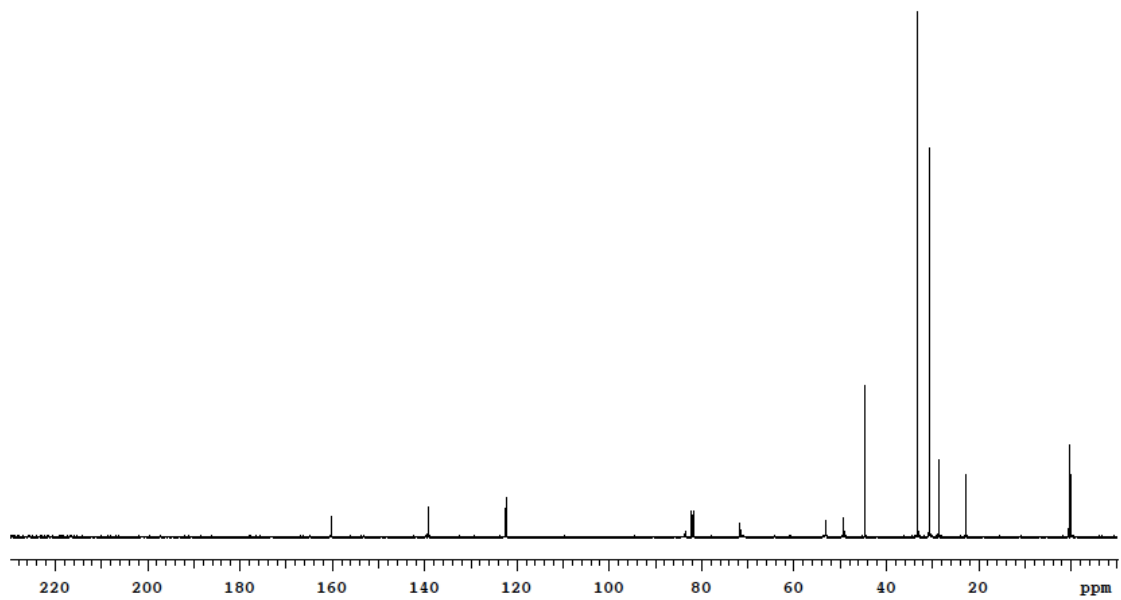

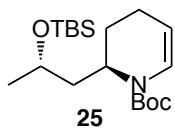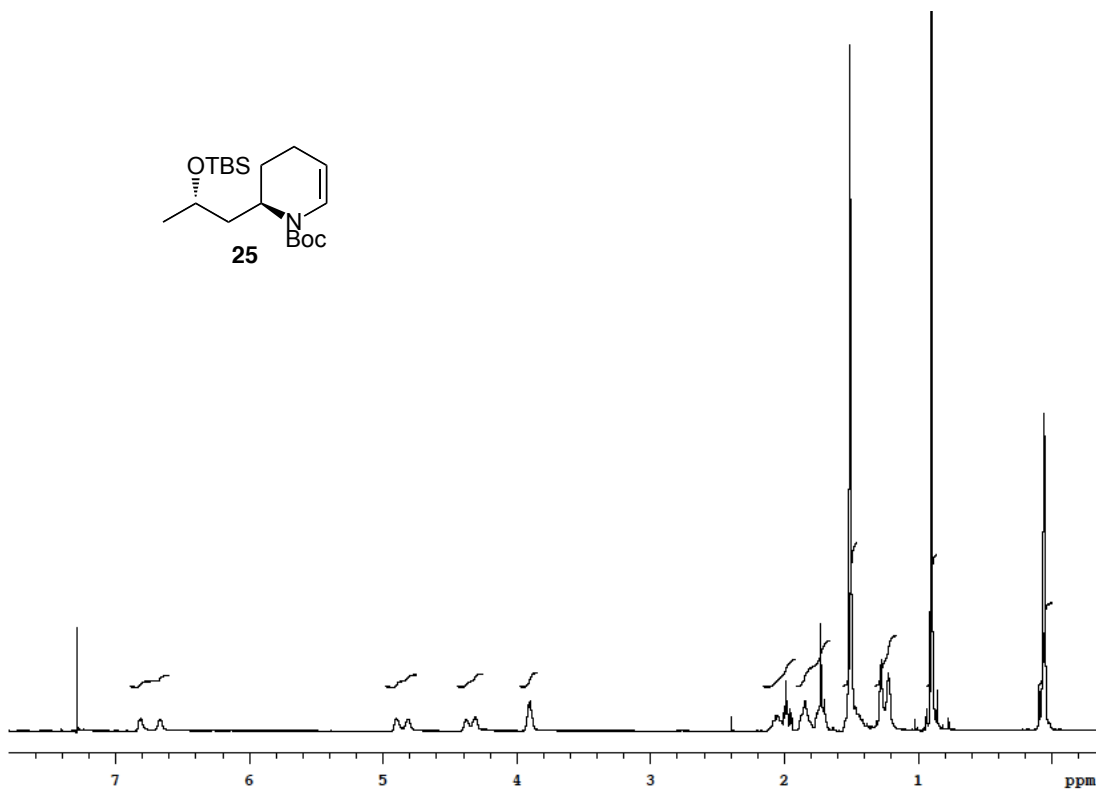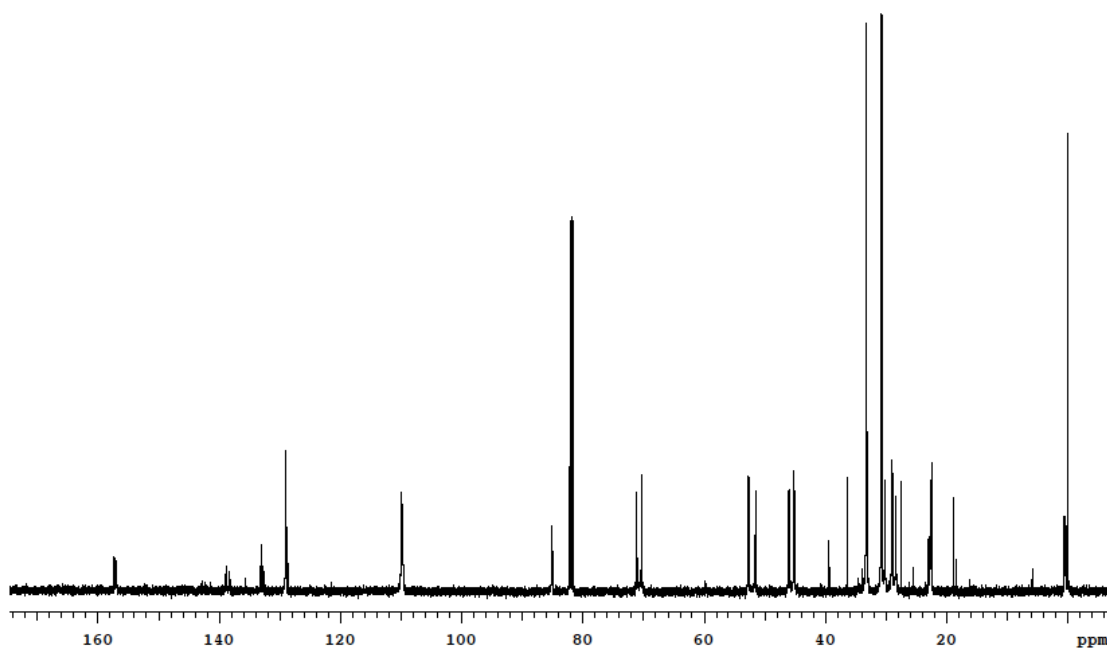



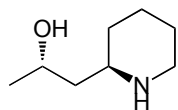

(+)-allosedridine

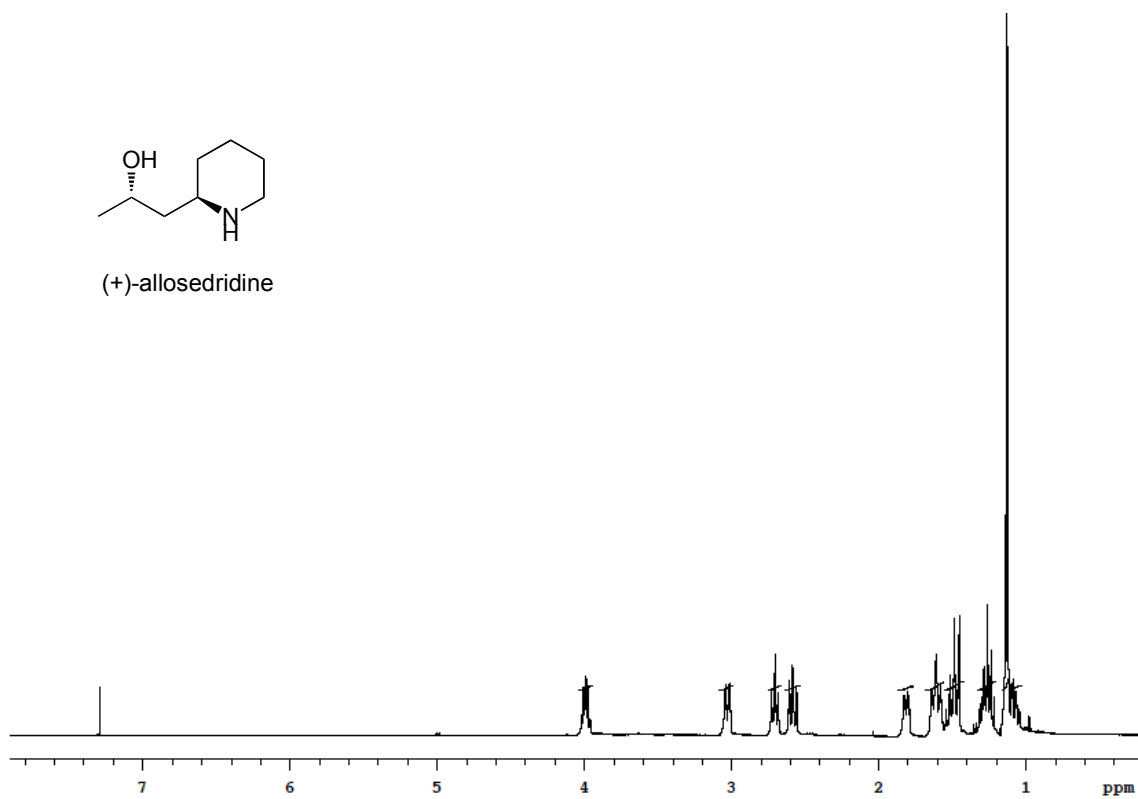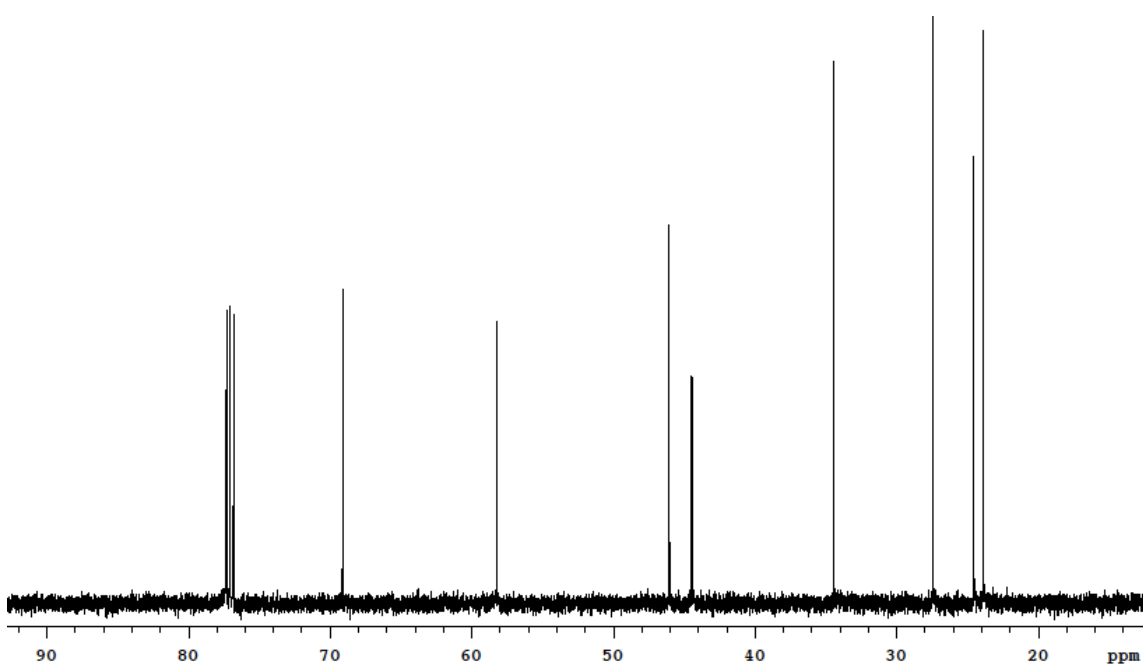

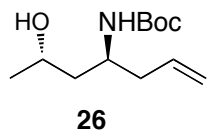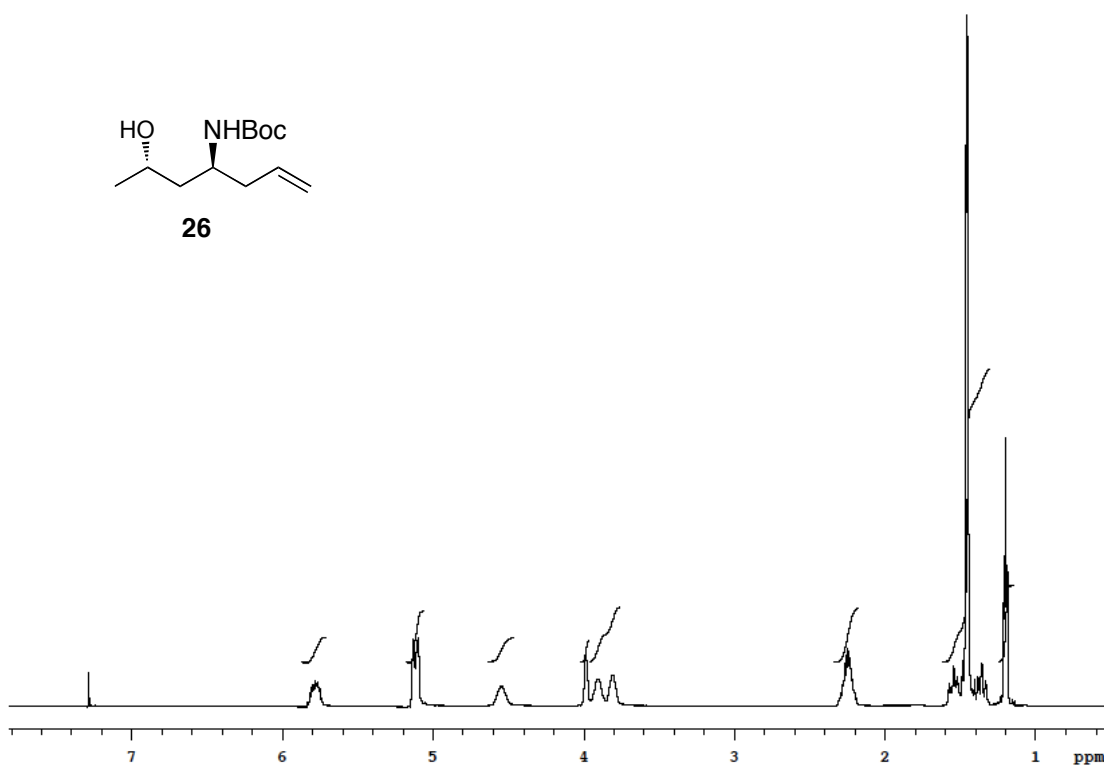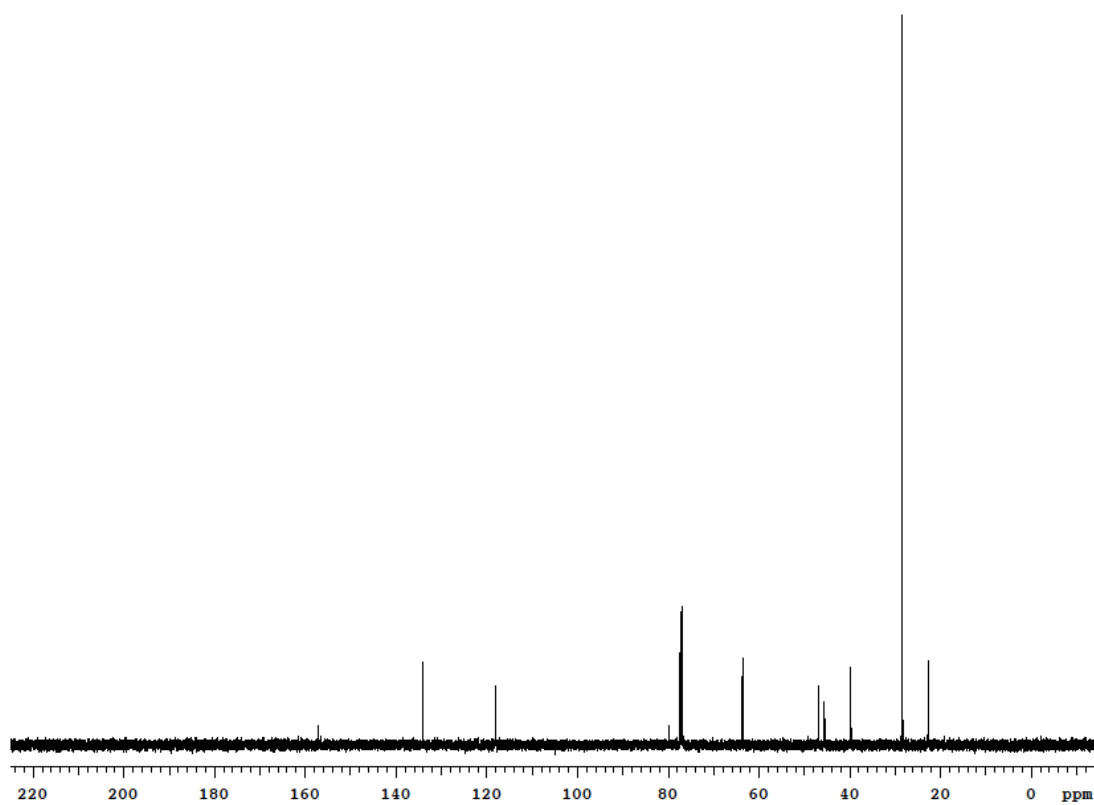

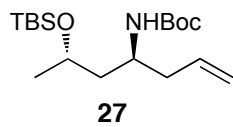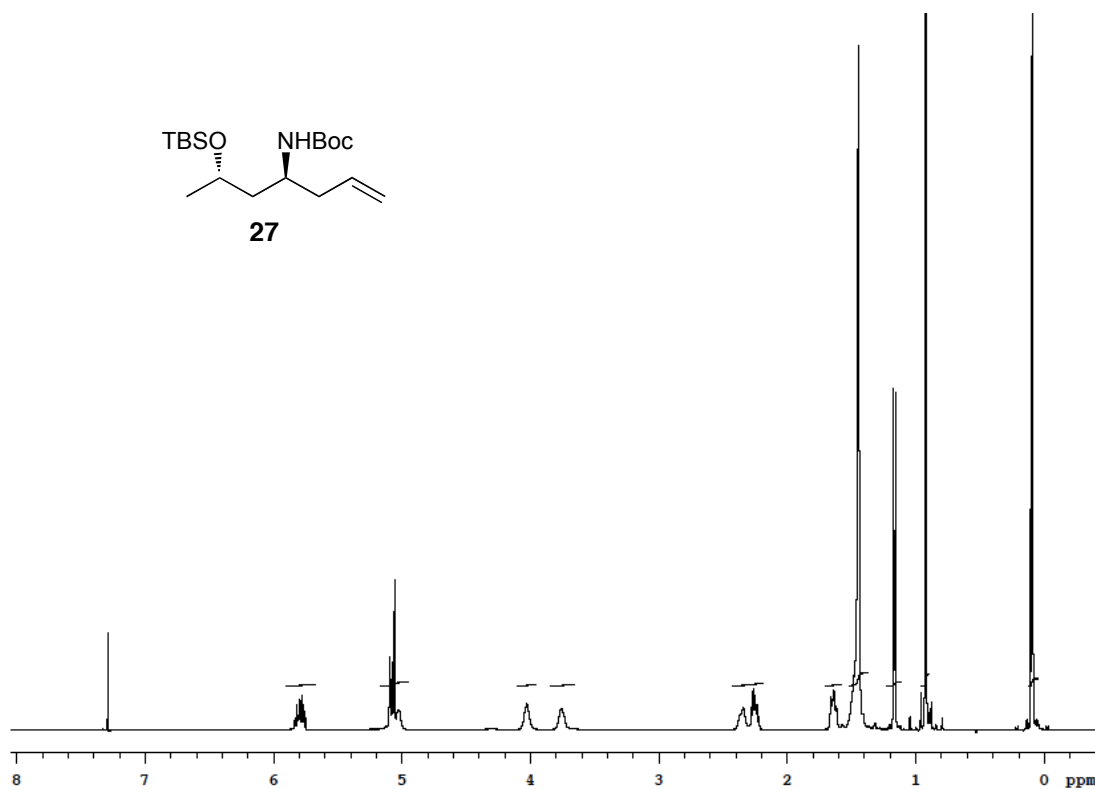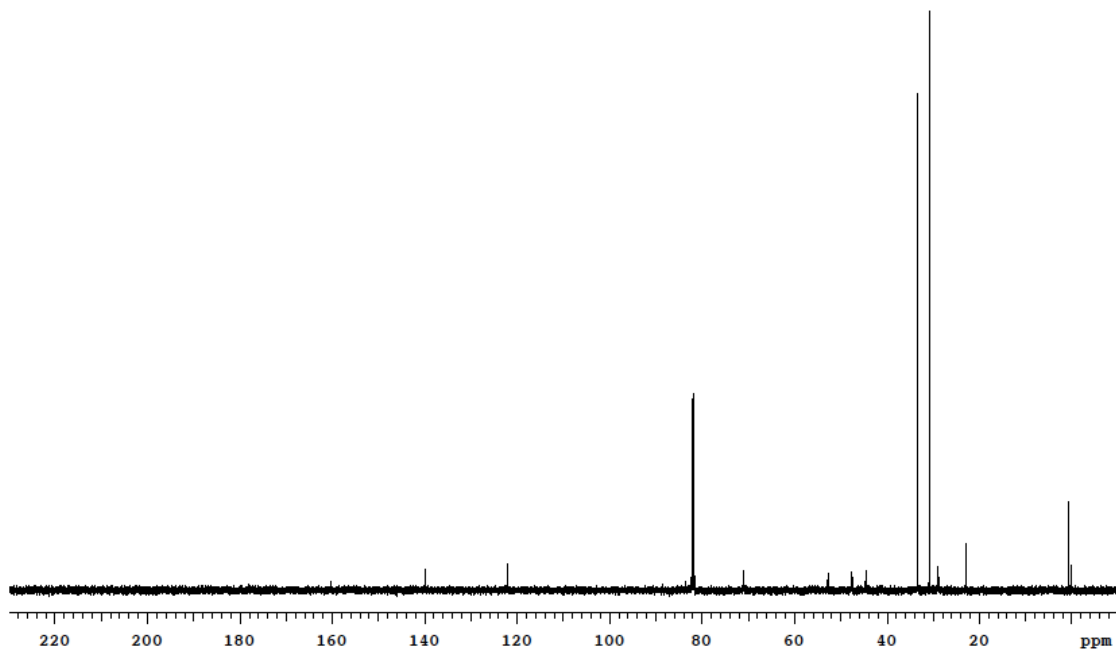

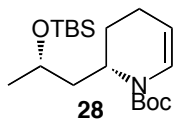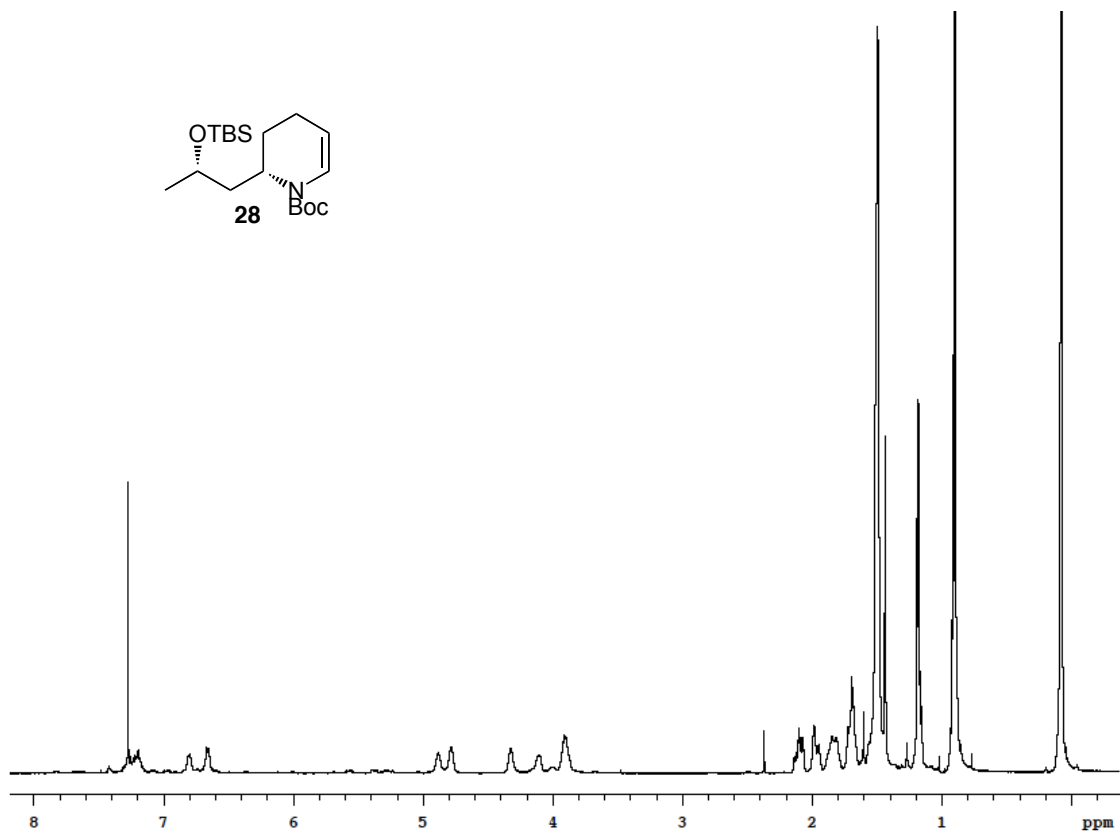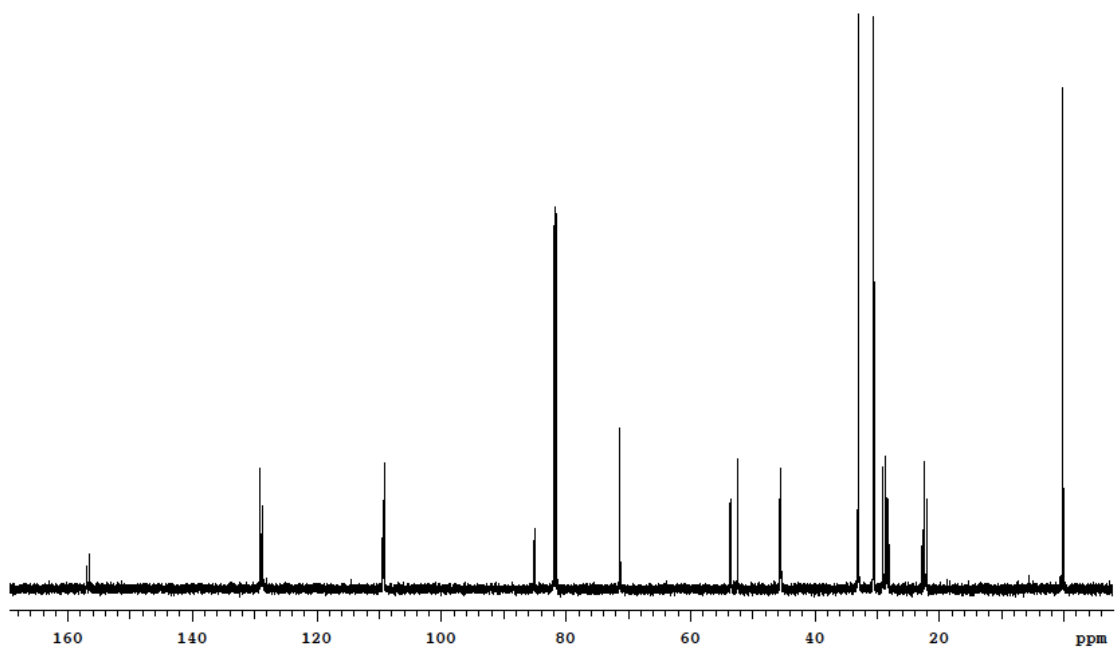

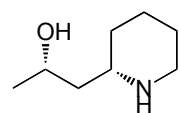

(+)-sedridine

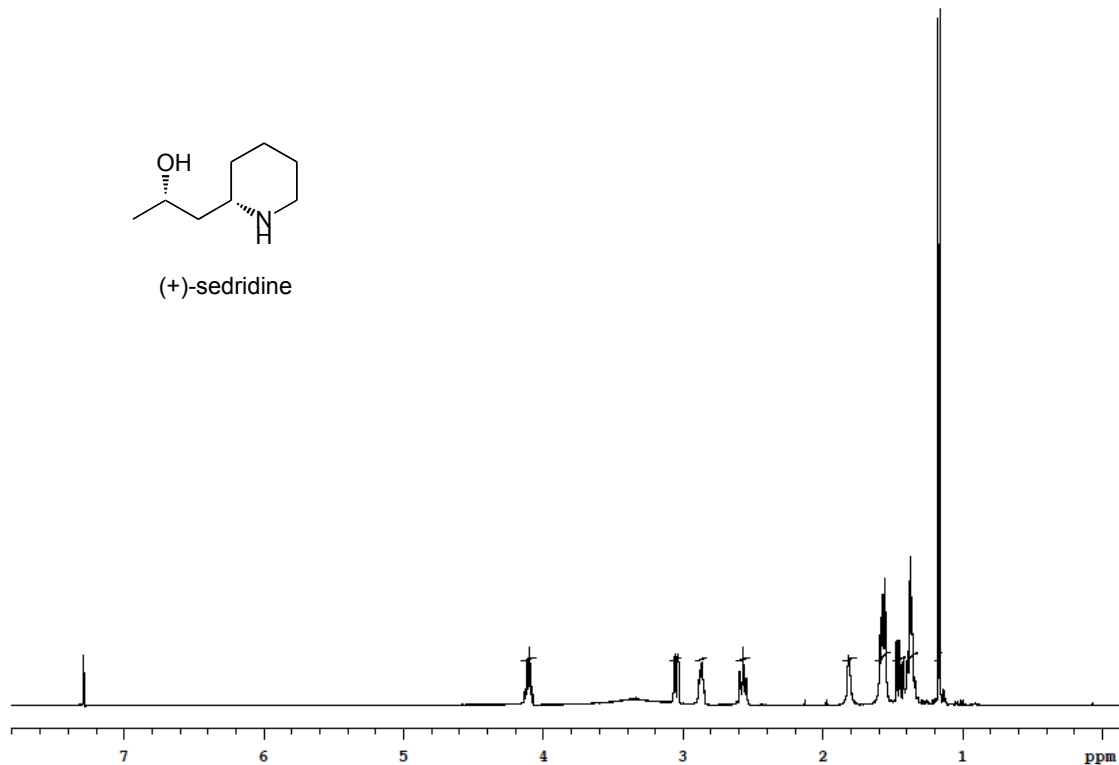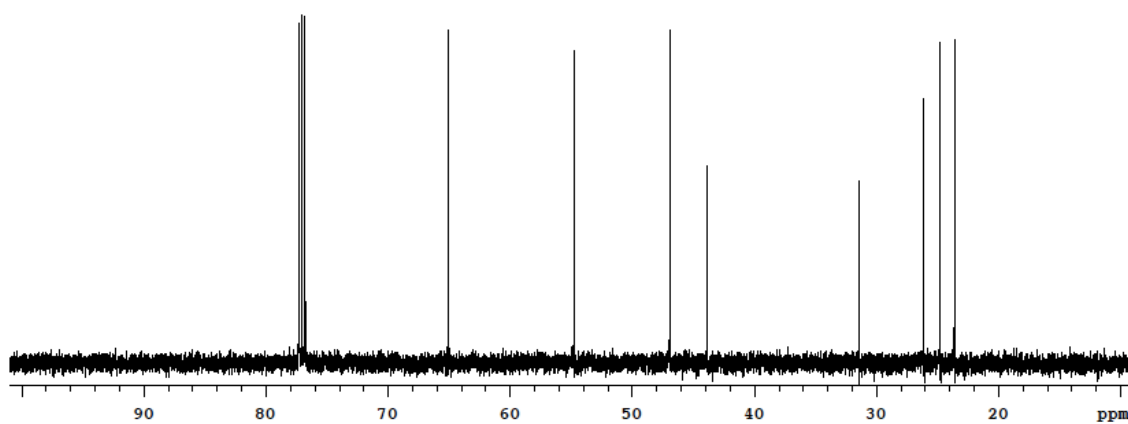

Supplement: NIHMS431323-supplement-2_si_002.pdf [file NIHMS431323-supplement-2_si_002.pdf]
